# Supplementary material for: A randomised phase II trial and feasibility study of palliative chemotherapy in frail or elderly patients with advanced gastroesophageal cancer (321GO)
Source: PubMed Central journal article supplement — Br J Cancer. 2017 Jan 17;116(4):472–8. doi: 10.1038/bjc.2016.442 (PMC5318975; doi:10.1038/bjc.2016.442), 2017-01-17
Supplement: bjc2016442x1.pdf [file bjc2016442x1.pdf]

## 321GO Trial

### *Three, Two or One Drug Chemotherapy for Advanced Gastroesophageal Cancer: a Feasibility Study in Frail and/or Elderly Patients*

## Baseline Comprehensive Health Assessment (CHA)

Notes for Research Nurse/Data Manager:

This baseline health assessment is an indispensable part of the 321GO trial. It must be completed **after** obtaining the patient's consent, but **before** telephoning the TRIAL CENTRE to register and randomise the patient. The CHA is in two parts, (a) a nurse-administered assessment of physical parameters, mental state and medical history, and (b) a patient-completed questionnaire dealing with various aspects of quality of life. **Randomisation will not be performed until both parts of the CHA have been completed.**

### CHA Nurse-Administered Section:

For this section of the CHA, you need a quiet, private environment where the patient can answer questions without feeling pressurised or "on trial". Ensure the patient is comfortable and not hungry, thirsty or in need of the toilet or analgesia. Hearing aids, if used, should be working. The patient may have a carer present, but if so ask them not to answer questions on the patient's behalf. If an interpreter is required, use a professional interpreter in preference to a relative.

You will need: a blank sheet of paper; scales and a measure for height and weight; a tape measure for arm circumference.

|                  |                     |                                        |
|------------------|---------------------|----------------------------------------|
| Patient initials | Date form completed | Trial N°. (complete after registering) |
|------------------|---------------------|----------------------------------------|

### Section P – Physical tests

|                    |                    |                                                                            |
|--------------------|--------------------|----------------------------------------------------------------------------|
| P.1) height in cm: | P.2) weight in kg: | P.3) right arm circumference in cm<br>(midway between elbow and shoulder): |
|--------------------|--------------------|----------------------------------------------------------------------------|

**P.4) approximate weight change in past 3 months:**

Ask the patient if they are aware of having lost or gained weight:

don't know

weight loss. If so, how much? Approx .....kg ( $\frac{1}{2}$  stone = 3 kg)

weight gain If so, how much? Approx .....kg ( $\frac{1}{2}$  stone = 3 kg)

## Section N (Mini Nutritional Assessment)

Ask the patient the following questions (exact words in **bold**) clearly or make the appropriate assessment and score the patient's answers.

|                                                                                                                                                                                                                                                                                                                                                                                      |                                      |                                        |                                      |                                      |
|--------------------------------------------------------------------------------------------------------------------------------------------------------------------------------------------------------------------------------------------------------------------------------------------------------------------------------------------------------------------------------------|--------------------------------------|----------------------------------------|--------------------------------------|--------------------------------------|
| N.1) <b>“Has your food intake declined over the past 3 months?”</b><br>( <i>may be due to any cause such as loss of appetite, digestive problems, chewing or swallowing difficulties</i> )<br>0 = severe decline in food intake<br>1 = moderate decline in food intake<br>2 = no loss of appetite                                                                                    | <input type="checkbox"/><br><b>0</b> | <input type="checkbox"/><br><b>1</b>   | <input type="checkbox"/><br><b>2</b> |                                      |
| N.2) <b>“How much weight loss have you had over the past 3 months?”</b><br>0 = weight loss greater than 3kg (6.6lbs)<br>1 = does not know<br>2 = weight loss between 1 and 3kg (2.2 and 6.6lb)<br>3 = no weight loss                                                                                                                                                                 | <input type="checkbox"/><br><b>0</b> | <input type="checkbox"/><br><b>1</b>   | <input type="checkbox"/><br><b>2</b> | <input type="checkbox"/><br><b>3</b> |
| N.3) <b>“Is it easy for you to get around in and outside the home?”</b><br>0 = bed or chair bound<br>1 = able to get out of bed or chair but does not go out<br>2 = goes out                                                                                                                                                                                                         | <input type="checkbox"/><br><b>0</b> | <input type="checkbox"/><br><b>1</b>   | <input type="checkbox"/><br><b>2</b> |                                      |
| N.4) <b>“Have you suffered stress or a new disease in the past 3 months?”</b> ( <i>may include a new cancer diagnosis or chemotherapy toxicity</i> )<br>0 = yes<br>1 = no                                                                                                                                                                                                            | <input type="checkbox"/><br><b>0</b> | <input type="checkbox"/><br><b>1</b>   |                                      |                                      |
| N.5) Does the patient have current neuropsychological problems<br>0 = severe dementia or depression<br>1 = mild dementia<br>2 = no psychological problems                                                                                                                                                                                                                            | <input type="checkbox"/><br><b>0</b> | <input type="checkbox"/><br><b>1</b>   | <input type="checkbox"/><br><b>2</b> |                                      |
| N.6) Body Mass Index (BMI) = weight in kg / height in m <sup>2</sup><br>0 = BMI less than 19<br>1 = BMI 19 to less than 21<br>2 = BMI 21 to less than 23<br>3 = BMI 23 or greater                                                                                                                                                                                                    | <input type="checkbox"/><br><b>0</b> | <input type="checkbox"/><br><b>1</b>   | <input type="checkbox"/><br><b>2</b> | <input type="checkbox"/><br><b>3</b> |
| N.7) Does the patient live independently ( <i>not in a nursing home or hospital</i> )<br>0 = no<br>1 = yes                                                                                                                                                                                                                                                                           | <input type="checkbox"/><br><b>0</b> | <input type="checkbox"/><br><b>1</b>   |                                      |                                      |
| N.8) <b>“Do you take more than 3 different prescription drugs a day”</b><br>0 = yes<br>1 = no                                                                                                                                                                                                                                                                                        | <input type="checkbox"/><br><b>0</b> | <input type="checkbox"/><br><b>1</b>   |                                      |                                      |
| N.9) Does the patient have pressure sores or skin ulcers?<br>0 = yes<br>1 = no                                                                                                                                                                                                                                                                                                       | <input type="checkbox"/><br><b>0</b> | <input type="checkbox"/><br><b>1</b>   |                                      |                                      |
| N.10) <b>“How many full meals do you eat daily?”</b><br>0 = 1 meal<br>1 = 2 meals<br>3 = 3 meals or more                                                                                                                                                                                                                                                                             | <input type="checkbox"/><br><b>0</b> | <input type="checkbox"/><br><b>1</b>   | <input type="checkbox"/><br><b>2</b> |                                      |
| N.11) Consumption markers for protein intake.<br>• <b>“Do you have at least one serving of dairy products (milk, cheese, yoghurt) per day?”</b> : yes or no<br>• <b>“Do you have two or more servings of legumes or eggs per week?”</b> : yes or no<br>• <b>“Do you have meat, fish or poultry everyday?”</b> : yes or no<br>0.0 = if 0 or 1 yes<br>0.5 = if 2 yes<br>1.0 = if 3 yes | <input type="checkbox"/><br><b>0</b> | <input type="checkbox"/><br><b>0.5</b> | <input type="checkbox"/><br><b>1</b> |                                      |
| N.12) <b>“Do you eat 2 or more servings of fruits or vegetables per day?”</b><br>0 = no<br>1 = yes                                                                                                                                                                                                                                                                                   | <input type="checkbox"/><br><b>0</b> | <input type="checkbox"/><br><b>1</b>   |                                      |                                      |

|                                                                                                                                                                                                                    |                                      |                                        |                                      |
|--------------------------------------------------------------------------------------------------------------------------------------------------------------------------------------------------------------------|--------------------------------------|----------------------------------------|--------------------------------------|
| N.13) <b>“How many cups of fluid do you drink a day?”</b><br>0.0 = less than 3 cups<br>0.5 = 3 to 5 cups<br>1.0 = more than 5 cups                                                                                 | <input type="checkbox"/><br><b>0</b> | <input type="checkbox"/><br><b>0.5</b> | <input type="checkbox"/><br><b>1</b> |
| N.14) <b>“Do you have any difficulty with feeding yourself?”</b><br>0 = unable to eat without assistance<br>1 = self-fed with some difficulty<br>2 = self-fed without any problem                                  | <input type="checkbox"/><br><b>0</b> | <input type="checkbox"/><br><b>1</b>   | <input type="checkbox"/><br><b>2</b> |
| N.15) <b>“Do you feel that you are malnourished”</b><br>0 = views self as being malnourished<br>1 = is uncertain of nutritional state<br>2 = views self as having no nutritional problem                           | <input type="checkbox"/><br><b>0</b> | <input type="checkbox"/><br><b>1</b>   | <input type="checkbox"/><br><b>2</b> |
| N.16) <b>“In comparison with other people of the same age do you consider yourself better or less well nourished”</b><br>0.0 = not as good<br>0.5 = does not know<br>1.0 = as good<br>2.0 = better                 | <input type="checkbox"/><br><b>0</b> | <input type="checkbox"/><br><b>0.5</b> | <input type="checkbox"/><br><b>1</b> |
| N.17) Mid-arm circumference (MAC) in cm (girth of the <i>non-dominant</i> arm midway between the elbow and the shoulder)<br>0.0 = MAC less than 21cm<br>0.5 = MAC between 21 and 22cm<br>1.0 = MAC 22cm or greater | <input type="checkbox"/><br><b>0</b> | <input type="checkbox"/><br><b>0.5</b> | <input type="checkbox"/><br><b>1</b> |
| N.18) Calf circumference (CC) in cm (measure the girth around the <i>largest</i> part of the calf)<br>0 = CC less than 31cm<br>1 = CC 31cm or greater                                                              | <input type="checkbox"/><br><b>0</b> | <input type="checkbox"/><br><b>1</b>   |                                      |

### Section C (Charlson Co-Morbidity Index)

This section is completed from the medical notes, although it is helpful to do so whilst the patient is still present so that you can clarify any missing data (using lay terms). Record whether there is a past or current history of any of the following medical conditions (if in doubt, consult the doctor responsible):

|                                                                                                                                                                                          |                                     |                                    |
|------------------------------------------------------------------------------------------------------------------------------------------------------------------------------------------|-------------------------------------|------------------------------------|
| C.1) Myocardial infarct<br><i>History of medically documented myocardial infarction</i>                                                                                                  | <input type="checkbox"/><br>present | <input type="checkbox"/><br>absent |
| C.2) Congestive heart failure<br><br><b><i>Symptomatic CHF with response to specific treatment</i></b>                                                                                   | <input type="checkbox"/><br>present | <input type="checkbox"/><br>absent |
| C.3) Peripheral vascular disease<br><i>Intermittent claudication, peripheral arterial bypass for insufficiency, gangrene, acute arterial insufficiency, untreated aneurysm (&gt;6cm)</i> | <input type="checkbox"/><br>present | <input type="checkbox"/><br>absent |
| C.4) Cerebrovascular disease (except hemiplegia)<br><br><i>History of TIA, or CVA with no or minor sequelae</i>                                                                          | <input type="checkbox"/><br>present | <input type="checkbox"/><br>absent |
| C.5) Dementia<br><br><i>Chronic cognitive deficit</i>                                                                                                                                    | <input type="checkbox"/><br>present | <input type="checkbox"/><br>absent |
| C.6) Chronic pulmonary disease<br><i>Symptomatic dyspnoe due to chronic respiratory conditions (including asthma)</i>                                                                    | <input type="checkbox"/><br>present | <input type="checkbox"/><br>absent |
| C.7) Connective tissue disease<br><i>SLE, polymyositis, mixed CTD, polymyalgia rheumatica, moderate to severe RA.</i>                                                                    | <input type="checkbox"/><br>present | <input type="checkbox"/><br>absent |
| C.8) Ulcer disease<br><i>Patients who have required treatment for PUD</i>                                                                                                                | <input type="checkbox"/><br>present | <input type="checkbox"/><br>absent |
| C.9) Mild liver disease<br><i>Cirrhosis without PHT, chronic hepatitis</i>                                                                                                               | <input type="checkbox"/><br>present | <input type="checkbox"/><br>absent |
| C.10) Diabetes (without complications)<br><br><i>Diabetes with medication</i>                                                                                                            | <input type="checkbox"/><br>present | <input type="checkbox"/><br>absent |

|                                                                                                                                                                                              |                                     |                                    |
|----------------------------------------------------------------------------------------------------------------------------------------------------------------------------------------------|-------------------------------------|------------------------------------|
| C.11) Diabetes with end organ damage<br><i>Retinopathy, neuropathy, nephropathy</i>                                                                                                          | <input type="checkbox"/><br>present | <input type="checkbox"/><br>absent |
| C.12) Hemiplegia<br><i>Hemiplegia or paraplegia</i>                                                                                                                                          | <input type="checkbox"/><br>present | <input type="checkbox"/><br>absent |
| C.13) Moderate or severe renal disease<br><i>Creatinine &gt; 265 umol/l, dialysis, transplantation, uraemic syndrome</i>                                                                     | <input type="checkbox"/><br>present | <input type="checkbox"/><br>absent |
| C.14) 2 <sup>nd</sup> Solid tumour (non metastatic)<br><i>Initially treated in the last 5 years. Excl non-melanomatous skin ca, and in situ cervical ca.</i>                                 | <input type="checkbox"/><br>present | <input type="checkbox"/><br>absent |
| C.15) Leukaemia<br><i>CML, CLL, AML, ALL, PV</i>                                                                                                                                             | <input type="checkbox"/><br>present | <input type="checkbox"/><br>absent |
| C.16) Lymphoma, Multiple myeloma<br><i>Non Hodgkin's Lymphoma (NHL), Hodgkins, Waldenstrom, multiple myeloma</i>                                                                             | <input type="checkbox"/><br>present | <input type="checkbox"/><br>absent |
| C.17) Moderate or severe liver disease<br><i>Cirrhosis with PHT +/- variceal bleeding</i>                                                                                                    | <input type="checkbox"/><br>present | <input type="checkbox"/><br>absent |
| C.18) 2 <sup>nd</sup> Metastatic solid tumour                                                                                                                                                | <input type="checkbox"/><br>present | <input type="checkbox"/><br>absent |
| C.19) AIDS<br><i>AIDS and AIDS related complex</i>                                                                                                                                           | <input type="checkbox"/><br>present | <input type="checkbox"/><br>absent |
| <p><b>NB Now please go back and check that patient ID and date are completed at the top of this form, then ask the patient to complete the patient questionnaire section of the CHA.</b></p> |                                     |                                    |

## CHA Patient Questionnaire Section:

This section of the CHA is a patient-completed questionnaire. Please ensure the patient has a relaxed, private environment such as a clinic room, **not a public waiting area**. Ensure they are comfortable and not hungry, thirsty or in need of the toilet or analgesia. The patient may have a carer present, but if so ask them not to answer questions on the patient's behalf. If an interpreter is required, use a professional interpreter rather than a relative, if possible.

Some patients will require help reading or interpreting the questions, or ticking the response boxes. The research nurse or data manager should offer to sit with the patient and help if they wish, but if so should not change the patient's initial "gut reaction" responses. **When the patient has finished, the research nurse or data manager should look through the questionnaire before the patient leaves, check that there are no missing or unclear answers and check that the patient ID and date are complete.**

Dear Patient,

As part of our research into finding the best chemotherapy for your condition, we'd like to ask you some questions about your activities, symptoms and feelings. Would you please go through this questionnaire and, for each question, tick the answer that fits most closely, even if it is not exact. If there are questions you cannot answer, please ask the nurse for help (or, if you would prefer, the nurse can sit with you and read out all the questions).

Thank you!

|                      |                                   |                                                 |
|----------------------|-----------------------------------|-------------------------------------------------|
| <b>Your initials</b> | <b>/ /</b><br><b>Today's Date</b> | <b>Trial N<sup>o</sup>. (Nurse to complete)</b> |
|----------------------|-----------------------------------|-------------------------------------------------|

***First, some questions about what activities you can manage currently:***

|                                                        |                                        |                                       |                                                   |                                          |
|--------------------------------------------------------|----------------------------------------|---------------------------------------|---------------------------------------------------|------------------------------------------|
| A.1) Do you walk around outside?                       | <input type="checkbox"/><br>not at all | <input type="checkbox"/><br>with help | <input type="checkbox"/><br>alone with difficulty | <input type="checkbox"/><br>alone easily |
| A.2) Do you climb stairs?                              | <input type="checkbox"/><br>not at all | <input type="checkbox"/><br>with help | <input type="checkbox"/><br>alone with difficulty | <input type="checkbox"/><br>alone easily |
| A.3) Do you get in and out of the car?                 | <input type="checkbox"/><br>not at all | <input type="checkbox"/><br>with help | <input type="checkbox"/><br>alone with difficulty | <input type="checkbox"/><br>alone easily |
| A.4) Do you walk over uneven ground?                   | <input type="checkbox"/><br>not at all | <input type="checkbox"/><br>with help | <input type="checkbox"/><br>alone with difficulty | <input type="checkbox"/><br>alone easily |
| A.5) Do you cross roads?                               | <input type="checkbox"/><br>not at all | <input type="checkbox"/><br>with help | <input type="checkbox"/><br>alone with difficulty | <input type="checkbox"/><br>alone easily |
| A.6) Do you travel on public transport?                | <input type="checkbox"/><br>not at all | <input type="checkbox"/><br>with help | <input type="checkbox"/><br>alone with difficulty | <input type="checkbox"/><br>alone easily |
| A.8) Do you manage to feed yourself?                   | <input type="checkbox"/><br>not at all | <input type="checkbox"/><br>with help | <input type="checkbox"/><br>alone with difficulty | <input type="checkbox"/><br>alone easily |
| A.9) Do you manage to make yourself a hot drink?       | <input type="checkbox"/><br>not at all | <input type="checkbox"/><br>with help | <input type="checkbox"/><br>alone with difficulty | <input type="checkbox"/><br>alone easily |
| A.10) Do you take hot drinks from one room to another? | <input type="checkbox"/><br>not at all | <input type="checkbox"/><br>with help | <input type="checkbox"/><br>alone with difficulty | <input type="checkbox"/><br>alone easily |
| A.11) Do you do the washing up?                        | <input type="checkbox"/><br>not at all | <input type="checkbox"/><br>with help | <input type="checkbox"/><br>alone with difficulty | <input type="checkbox"/><br>alone easily |

|                                                      |                                        |                                       |                                                   |                                          |
|------------------------------------------------------|----------------------------------------|---------------------------------------|---------------------------------------------------|------------------------------------------|
| A.12) Do you make yourself a hot snack?              | <input type="checkbox"/><br>not at all | <input type="checkbox"/><br>with help | <input type="checkbox"/><br>alone with difficulty | <input type="checkbox"/><br>alone easily |
| A.14) Do you manage your own money when you are out? | <input type="checkbox"/><br>not at all | <input type="checkbox"/><br>with help | <input type="checkbox"/><br>alone with difficulty | <input type="checkbox"/><br>alone easily |
| A.15) Do you wash small items of clothing?           | <input type="checkbox"/><br>not at all | <input type="checkbox"/><br>with help | <input type="checkbox"/><br>alone with difficulty | <input type="checkbox"/><br>alone easily |
| A.16) Do you do your own shopping?                   | <input type="checkbox"/><br>not at all | <input type="checkbox"/><br>with help | <input type="checkbox"/><br>alone with difficulty | <input type="checkbox"/><br>alone easily |
| A.17) Do you do a full clothes wash?                 | <input type="checkbox"/><br>not at all | <input type="checkbox"/><br>with help | <input type="checkbox"/><br>alone with difficulty | <input type="checkbox"/><br>alone easily |
| A.19) Do you read newspapers or books?               | <input type="checkbox"/><br>not at all | <input type="checkbox"/><br>with help | <input type="checkbox"/><br>alone with difficulty | <input type="checkbox"/><br>alone easily |
| A.20) Do you use the telephone?                      | <input type="checkbox"/><br>not at all | <input type="checkbox"/><br>with help | <input type="checkbox"/><br>alone with difficulty | <input type="checkbox"/><br>alone easily |
| A.21) Do you write letters?                          | <input type="checkbox"/><br>not at all | <input type="checkbox"/><br>with help | <input type="checkbox"/><br>alone with difficulty | <input type="checkbox"/><br>alone easily |
| A.22) Do you go out socially?                        | <input type="checkbox"/><br>not at all | <input type="checkbox"/><br>with help | <input type="checkbox"/><br>alone with difficulty | <input type="checkbox"/><br>alone easily |
| A.23) Do you manage our own garden?                  | <input type="checkbox"/><br>not at all | <input type="checkbox"/><br>with help | <input type="checkbox"/><br>alone with difficulty | <input type="checkbox"/><br>alone easily |
| A.24) Do you drive a car?                            | <input type="checkbox"/><br>not at all | <input type="checkbox"/><br>with help | <input type="checkbox"/><br>alone with difficulty | <input type="checkbox"/><br>alone easily |

|                                                                                        |                                                                               |                                                                                 |                                                                        |
|----------------------------------------------------------------------------------------|-------------------------------------------------------------------------------|---------------------------------------------------------------------------------|------------------------------------------------------------------------|
| E.1) Over the past <b>6 weeks</b> how many times has your GP visited you?              | <input type="checkbox"/><br>not at all                                        | or: How many times?:.....                                                       |                                                                        |
| E.2) Over the past <b>6 weeks</b> how many times have you visited your GP?             | <input type="checkbox"/><br>not at all                                        | or: How many times?:.....                                                       |                                                                        |
| E.3) Over the past <b>6 weeks</b> how often have you been visited by a district nurse? | <input type="checkbox"/><br>not at all                                        | or: How many times?:.....                                                       |                                                                        |
| E.4) Over the past <b>6 weeks</b> , have you been visited by a MacMillan nurse?        | <input type="checkbox"/><br>not at all                                        | or: How many times?:.....                                                       |                                                                        |
| E.5) Which best describes your mobility <b>today</b> ?                                 | <input type="checkbox"/><br>I have no problems walking about                  | <input type="checkbox"/><br>I have some problems walking about                  | <input type="checkbox"/><br>I am confined to bed                       |
| E.6) Which best describes your self-care <b>today</b> ?                                | <input type="checkbox"/><br>I have no problems with self care                 | <input type="checkbox"/><br>I have some problems washing or dressing            | <input type="checkbox"/><br>I am unable to wash or dress myself        |
| E.7) Which best describes your activities <b>today</b> ?                               | <input type="checkbox"/><br>I have no problems performing my usual activities | <input type="checkbox"/><br>I have some problems performing my usual activities | <input type="checkbox"/><br>I am unable to perform my usual activities |
| E.8) Do you have any pain <b>today</b> ?                                               | <input type="checkbox"/><br>I have no pain or discomfort                      | <input type="checkbox"/><br>I have some pain or discomfort                      | <input type="checkbox"/><br>I have extreme pain or discomfort          |
| E.9) Which best describes your mood <b>today</b> ?                                     | <input type="checkbox"/><br>I am not anxious or depressed                     | <input type="checkbox"/><br>I am moderately anxious or depressed                | <input type="checkbox"/><br>I am extremely anxious or depressed        |

**Now some questions about your symptoms over the past week.**

|                                                                                                          |                                        |                                      |                                         |                                       |
|----------------------------------------------------------------------------------------------------------|----------------------------------------|--------------------------------------|-----------------------------------------|---------------------------------------|
| Q.1) Do you have any trouble doing strenuous activities, like carrying a heavy shopping bag or suitcase? | <input type="checkbox"/><br>not at all | <input type="checkbox"/><br>a little | <input type="checkbox"/><br>quite a bit | <input type="checkbox"/><br>very much |
| Q.2) Do you have any trouble taking a long walk?                                                         | <input type="checkbox"/><br>not at all | <input type="checkbox"/><br>a little | <input type="checkbox"/><br>quite a bit | <input type="checkbox"/><br>very much |
| Q.3) Do you have any trouble taking a short walk out of the house?                                       | <input type="checkbox"/><br>not at all | <input type="checkbox"/><br>a little | <input type="checkbox"/><br>quite a bit | <input type="checkbox"/><br>very much |
| Q.4) Do you need to stay in a bed or a chair during the day?                                             | <input type="checkbox"/><br>not at all | <input type="checkbox"/><br>a little | <input type="checkbox"/><br>quite a bit | <input type="checkbox"/><br>very much |

|                                                                                    |                                        |                                      |                                         |                                       |
|------------------------------------------------------------------------------------|----------------------------------------|--------------------------------------|-----------------------------------------|---------------------------------------|
| Q.5) Do you need help with eating, dressing, washing yourself or using the toilet? | <input type="checkbox"/><br>not at all | <input type="checkbox"/><br>a little | <input type="checkbox"/><br>quite a bit | <input type="checkbox"/><br>very much |
|------------------------------------------------------------------------------------|----------------------------------------|--------------------------------------|-----------------------------------------|---------------------------------------|

***During the past week...***

|                                                                                                               |                                        |                                      |                                         |                                       |
|---------------------------------------------------------------------------------------------------------------|----------------------------------------|--------------------------------------|-----------------------------------------|---------------------------------------|
| Q.6) ...were you limited in doing either your work or other daily activities?                                 | <input type="checkbox"/><br>not at all | <input type="checkbox"/><br>a little | <input type="checkbox"/><br>quite a bit | <input type="checkbox"/><br>very much |
| Q.7) ...were you limited in pursuing your hobbies or other leisure activities?                                | <input type="checkbox"/><br>not at all | <input type="checkbox"/><br>a little | <input type="checkbox"/><br>quite a bit | <input type="checkbox"/><br>very much |
| Q.8) ...were you short of breath?                                                                             | <input type="checkbox"/><br>not at all | <input type="checkbox"/><br>a little | <input type="checkbox"/><br>quite a bit | <input type="checkbox"/><br>very much |
| Q.9) ...have you had pain?                                                                                    | <input type="checkbox"/><br>not at all | <input type="checkbox"/><br>a little | <input type="checkbox"/><br>quite a bit | <input type="checkbox"/><br>very much |
| Q.10) ...did you need to rest?                                                                                | <input type="checkbox"/><br>not at all | <input type="checkbox"/><br>a little | <input type="checkbox"/><br>quite a bit | <input type="checkbox"/><br>very much |
| Q.11) ...have you had trouble sleeping?                                                                       | <input type="checkbox"/><br>not at all | <input type="checkbox"/><br>a little | <input type="checkbox"/><br>quite a bit | <input type="checkbox"/><br>very much |
| Q.12) ...have you felt weak?                                                                                  | <input type="checkbox"/><br>not at all | <input type="checkbox"/><br>a little | <input type="checkbox"/><br>quite a bit | <input type="checkbox"/><br>very much |
| Q.13) ...have you lacked appetite?                                                                            | <input type="checkbox"/><br>not at all | <input type="checkbox"/><br>a little | <input type="checkbox"/><br>quite a bit | <input type="checkbox"/><br>very much |
| Q.14) ...have you felt nauseated?                                                                             | <input type="checkbox"/><br>not at all | <input type="checkbox"/><br>a little | <input type="checkbox"/><br>quite a bit | <input type="checkbox"/><br>very much |
| Q.15) ...have you vomited?                                                                                    | <input type="checkbox"/><br>not at all | <input type="checkbox"/><br>a little | <input type="checkbox"/><br>quite a bit | <input type="checkbox"/><br>very much |
| Q.16) ...have you been constipated?                                                                           | <input type="checkbox"/><br>not at all | <input type="checkbox"/><br>a little | <input type="checkbox"/><br>quite a bit | <input type="checkbox"/><br>very much |
| Q.17) ...have you had diarrhoea?                                                                              | <input type="checkbox"/><br>not at all | <input type="checkbox"/><br>a little | <input type="checkbox"/><br>quite a bit | <input type="checkbox"/><br>very much |
| Q.18) ...were you tired?                                                                                      | <input type="checkbox"/><br>not at all | <input type="checkbox"/><br>a little | <input type="checkbox"/><br>quite a bit | <input type="checkbox"/><br>very much |
| Q.19) ...did pain interfere with your daily activities?                                                       | <input type="checkbox"/><br>not at all | <input type="checkbox"/><br>a little | <input type="checkbox"/><br>quite a bit | <input type="checkbox"/><br>very much |
| Q.20) ...have you had difficulty in concentrating on things, like reading a newspaper or watching television? | <input type="checkbox"/><br>not at all | <input type="checkbox"/><br>a little | <input type="checkbox"/><br>quite a bit | <input type="checkbox"/><br>very much |
| Q.21) ...did you feel tense?                                                                                  | <input type="checkbox"/><br>not at all | <input type="checkbox"/><br>a little | <input type="checkbox"/><br>quite a bit | <input type="checkbox"/><br>very much |
| Q.22) ...did you worry?                                                                                       | <input type="checkbox"/><br>not at all | <input type="checkbox"/><br>a little | <input type="checkbox"/><br>quite a bit | <input type="checkbox"/><br>very much |
| Q.23) ...did you feel irritable?                                                                              | <input type="checkbox"/><br>not at all | <input type="checkbox"/><br>a little | <input type="checkbox"/><br>quite a bit | <input type="checkbox"/><br>very much |
| Q.24) ...did you feel depressed?                                                                              | <input type="checkbox"/><br>not at all | <input type="checkbox"/><br>a little | <input type="checkbox"/><br>quite a bit | <input type="checkbox"/><br>very much |
| Q.25) ...have you had difficulty remembering things?                                                          | <input type="checkbox"/><br>not at all | <input type="checkbox"/><br>a little | <input type="checkbox"/><br>quite a bit | <input type="checkbox"/><br>very much |
| Q.26) ...has your physical condition or medical treatment interfered with your family life?                   | <input type="checkbox"/><br>not at all | <input type="checkbox"/><br>a little | <input type="checkbox"/><br>quite a bit | <input type="checkbox"/><br>very much |
| Q.27) ...has your physical condition or medical treatment interfered with your social activities?             | <input type="checkbox"/><br>not at all | <input type="checkbox"/><br>a little | <input type="checkbox"/><br>quite a bit | <input type="checkbox"/><br>very much |
| Q.28) ...has your physical condition or medical treatment caused you financial difficulties?                  | <input type="checkbox"/><br>not at all | <input type="checkbox"/><br>a little | <input type="checkbox"/><br>quite a bit | <input type="checkbox"/><br>very much |
| OG.1) ... have you had problems eating solid food?                                                            | <input type="checkbox"/><br>not at all | <input type="checkbox"/><br>a little | <input type="checkbox"/><br>quite a bit | <input type="checkbox"/><br>very much |
| OG.2) ... have you had problems eating liquidised or soft foods?                                              | <input type="checkbox"/><br>not at all | <input type="checkbox"/><br>a little | <input type="checkbox"/><br>quite a bit | <input type="checkbox"/><br>very much |
| OG.3) ... have you had problems drinking liquids?                                                             | <input type="checkbox"/><br>not at all | <input type="checkbox"/><br>a little | <input type="checkbox"/><br>quite a bit | <input type="checkbox"/><br>very much |



|                                                                                                |                                        |                                      |                                         |                                       |          |          |                       |
|------------------------------------------------------------------------------------------------|----------------------------------------|--------------------------------------|-----------------------------------------|---------------------------------------|----------|----------|-----------------------|
| OG.4) ... have you had trouble enjoying your meals?                                            | <input type="checkbox"/><br>not at all | <input type="checkbox"/><br>a little | <input type="checkbox"/><br>quite a bit | <input type="checkbox"/><br>very much |          |          |                       |
| OG.5) ... have you felt full up too quickly after beginning to eat?                            | <input type="checkbox"/><br>not at all | <input type="checkbox"/><br>a little | <input type="checkbox"/><br>quite a bit | <input type="checkbox"/><br>very much |          |          |                       |
| OG.6) ... has it taken you a long time to complete your meals?                                 | <input type="checkbox"/><br>not at all | <input type="checkbox"/><br>a little | <input type="checkbox"/><br>quite a bit | <input type="checkbox"/><br>very much |          |          |                       |
| OG.7) ... have you had difficulty eating?                                                      | <input type="checkbox"/><br>not at all | <input type="checkbox"/><br>a little | <input type="checkbox"/><br>quite a bit | <input type="checkbox"/><br>very much |          |          |                       |
| OG.8) ... have you had acid indigestion of heartburn?                                          | <input type="checkbox"/><br>not at all | <input type="checkbox"/><br>a little | <input type="checkbox"/><br>quite a bit | <input type="checkbox"/><br>very much |          |          |                       |
| OG.9) ... has acid or bile coming into your mouth been a problem?                              | <input type="checkbox"/><br>not at all | <input type="checkbox"/><br>a little | <input type="checkbox"/><br>quite a bit | <input type="checkbox"/><br>very much |          |          |                       |
| OG.10) ... have you had discomfort when eating?                                                | <input type="checkbox"/><br>not at all | <input type="checkbox"/><br>a little | <input type="checkbox"/><br>quite a bit | <input type="checkbox"/><br>very much |          |          |                       |
| OG.11) ... have you had pain when you eat?                                                     | <input type="checkbox"/><br>not at all | <input type="checkbox"/><br>a little | <input type="checkbox"/><br>quite a bit | <input type="checkbox"/><br>very much |          |          |                       |
| OG.12) ... have you had pain in your stomach area?                                             | <input type="checkbox"/><br>not at all | <input type="checkbox"/><br>a little | <input type="checkbox"/><br>quite a bit | <input type="checkbox"/><br>very much |          |          |                       |
| OG.13) ... have you had discomfort in your stomach area?                                       | <input type="checkbox"/><br>not at all | <input type="checkbox"/><br>a little | <input type="checkbox"/><br>quite a bit | <input type="checkbox"/><br>very much |          |          |                       |
| OG.14) ... have you been thinking about your illness?                                          | <input type="checkbox"/><br>not at all | <input type="checkbox"/><br>a little | <input type="checkbox"/><br>quite a bit | <input type="checkbox"/><br>very much |          |          |                       |
| OG.15) ... have you felt worried about your health in the future?                              | <input type="checkbox"/><br>not at all | <input type="checkbox"/><br>a little | <input type="checkbox"/><br>quite a bit | <input type="checkbox"/><br>very much |          |          |                       |
| OG.16) ... have you had trouble with eating in front of other people?                          | <input type="checkbox"/><br>not at all | <input type="checkbox"/><br>a little | <input type="checkbox"/><br>quite a bit | <input type="checkbox"/><br>very much |          |          |                       |
| OG.17) ... have you had a dry mouth?                                                           | <input type="checkbox"/><br>not at all | <input type="checkbox"/><br>a little | <input type="checkbox"/><br>quite a bit | <input type="checkbox"/><br>very much |          |          |                       |
| OG.18) ... have you had problems with your sense of taste?                                     | <input type="checkbox"/><br>not at all | <input type="checkbox"/><br>a little | <input type="checkbox"/><br>quite a bit | <input type="checkbox"/><br>very much |          |          |                       |
| OG.19) ... have you felt physically less attractive as a result of your disease or treatment?  | <input type="checkbox"/><br>not at all | <input type="checkbox"/><br>a little | <input type="checkbox"/><br>quite a bit | <input type="checkbox"/><br>very much |          |          |                       |
| OG.20) ... have you had difficulty swallowing your saliva?                                     | <input type="checkbox"/><br>not at all | <input type="checkbox"/><br>a little | <input type="checkbox"/><br>quite a bit | <input type="checkbox"/><br>very much |          |          |                       |
| OG.21) ... have you choked when swallowing?                                                    | <input type="checkbox"/><br>not at all | <input type="checkbox"/><br>a little | <input type="checkbox"/><br>quite a bit | <input type="checkbox"/><br>very much |          |          |                       |
| OG.22) ... have you coughed?                                                                   | <input type="checkbox"/><br>not at all | <input type="checkbox"/><br>a little | <input type="checkbox"/><br>quite a bit | <input type="checkbox"/><br>very much |          |          |                       |
| OG.23) ... have you had trouble with talking?                                                  | <input type="checkbox"/><br>not at all | <input type="checkbox"/><br>a little | <input type="checkbox"/><br>quite a bit | <input type="checkbox"/><br>very much |          |          |                       |
| OG.24) ... have you been worried about your weight being too low?                              | <input type="checkbox"/><br>not at all | <input type="checkbox"/><br>a little | <input type="checkbox"/><br>quite a bit | <input type="checkbox"/><br>very much |          |          |                       |
| OG.25) ... were you upset by the loss of your hair? (answer only if you lost any hair)         | <input type="checkbox"/><br>not at all | <input type="checkbox"/><br>a little | <input type="checkbox"/><br>quite a bit | <input type="checkbox"/><br>very much |          |          |                       |
| OG.26) ... have you had soreness or redness of your hands or feet?                             | <input type="checkbox"/><br>not at all | <input type="checkbox"/><br>a little | <input type="checkbox"/><br>quite a bit | <input type="checkbox"/><br>very much |          |          |                       |
| OG.27) ... have you had difficulty handling small objects (eg buttons or zips)?                | <input type="checkbox"/><br>not at all | <input type="checkbox"/><br>a little | <input type="checkbox"/><br>quite a bit | <input type="checkbox"/><br>very much |          |          |                       |
| Q.29) How was your <b>overall health</b> during the past week? (put a circle around the score) | <b>1</b><br>Very poor                  | <b>2</b>                             | <b>3</b>                                | <b>4</b>                              | <b>5</b> | <b>6</b> | <b>7</b><br>Excellent |
| Q.30) And how was your <b>overall quality of life</b> during the past week?                    | <b>1</b><br>Very poor                  | <b>2</b>                             | <b>3</b>                                | <b>4</b>                              | <b>5</b> | <b>6</b> | <b>7</b><br>Excellent |

**Many thanks for helping us by filling in this questionnaire. Please now hand it to the research nurse. You may feel that you wish to discuss some of the issues which it has raised – please feel free to do so.**
